# Supplementary material for: Parameter space Kalman smoothers for multi-decadal climate analysis in high resolution coupled Global Circulation Models
Source: Copernicus journal article supplement (doi:10.5194/gmd-2018-48), 2018-03-06
Supplement: Supplementary file [file gmd-2018-48-AC2-supplement.pdf]

**Manuscript reference:** GMD-2018-48

**Title\*:** Evaluation of iterative Kalman smoother schemes for multi-decadal climate analysis with comprehensive Earth system models

**Date:** 05/09/2018

\*Modified from the discussion paper

### **Responses to Reviewer #2 (anonymous)**

We thank the reviewer for their positive comments, which will help improve the manuscript. Below we give each comment and describe how we are altering the manuscript to address the reviewer's concerns.

Let us note that indirectly prompted by Reviewer # 2, we have considered a new title for the manuscript as indicated above. In general, we are finishing a substantial rewriting of the manuscript, due to (a) specific request from the reviewers to shorten introductory parts and expand the results and discussions, and (b) reviewers' comments also have indirectly suggested us that some parts of the manuscript were in need of further explanation.

Thus the Introduction is now longer and the description of the paleoclimate context has been slightly expanded, but former section 2 (Problem definition) has been now dropped and compacted within the Introduction. The description of the nonlinear relation between the control variables and the observation space in the experiment with the Community Earth System Model (CESM) now receives more attention. The analysis with ETKF-GA (the Gaussian anamorphosis) is now more detailed, and the described scheme of the iterated Kalman smoother is now also included in the CESM experiment. Also, the first experiment, with the 1D energy balance model, has been updated with a new more adequate 4D-Var benchmarking.

### **Responses**

#### **Rev#2:**

This is a very interesting study, supported by a substantial amount of work, both theoretical and numerical. The theoretical and experimental parts are well balanced; the experiments are well chosen and interesting. The manuscript certainly should be considered for publication. Nevertheless, I believe it has a few flaws and requires significant improvements before being acceptable for publication.

In my opinion, the main issues are:

1. The manuscript is too long. Several discussions are unnecessary and frankly a bit wordy, especially in the introductory parts.

**Auth:** We have done a thorough revision of the manuscript, with a substantial number of sentences rephrased and shortened/dropped. Alternative we have expanded the Introduction to give some context of paleoclimate and support the rationale for the assumptions and applicability of the given schemes. Given the comments, we have also expanded the section regarding the tests with Gaussian Anamorphosis, and conducted additional tests in both experiments (now including the IKS in the CESM twin case). Please see new manuscript.

- Rev#2:** 2. There are quite a few typos that need to be corrected.

**Auth:** Typos have been corrected as found.

- Rev#2:** 3. I believe that there is no need to give these methods new names just because they are applied to parameters. But this is certainly up to the authors.

**Auth:** In the same sense that the EnKF provides a low-rank representation of the background covariance matrix, making it akin to but different from the KF, the methods used here differ

from the standard KF (iterations apart) in that they are explicitly solved as a function of numerically-based local sensitivity analysis (LSA), where sensitivities from observations to input parameters are estimated (conditionally) one-by-one to each of the considered inputs

While the IEnKS also uses (in its different versions) a strategy to get local sensitivities (e.g., differing from the average ensemble sensitivities of the EnRML, and the batch-EnRML), it is a low-rank scheme. We feel it is adequate to prepend some tag to “KF” (or “KS” for smoother) to clarify the schemes. We chose “parameter-space” as an implicit way to indicate the way sensitivities were constructed. With the comment we have considered that it is likely better to prepend “NLS-” for “numerical local sensitivity-”. Still we indicate the rationale for the labeling in the manuscript. On the other hand, to relate better to the “multiple data assimilation” strategy, we have replaced the “F” for fractional by an “M” for multistep in the formerly named pFKS.

With this, the names now used for the schemes are NLS-IKS (numerical local sensitivity, iterative Kalman smoother) and NLS-MKS (numerical local sensitivity, multistep Kalman smoother). Let us insist that the aim is not to claim these are fundamentally new filters, but to clarify their specificity. We hope the reviewer agrees with the need for clarification and that a labelling is suited.

**Rev#2:** 4. Please avoid the use of the term "adjoint method" which is - as of today - rarely used, ill-defined or at best does not precisely correspond to 4D-Var. See comments below.

**Auth:** In general, although we explicitly referred to “4D-Var” in Section 3 regarding the methodological description, we chose to use the “adjoint” term in other parts (mostly in Section 4), to comply with the terminology used by Paul and Losch (2012) ---for which this section was considered as an extension---, and by some oceanographers and climate scientists (e.g., regarding terminology, see Wunsch and Heimbach, 2013). We understand, however, the reviewer's point and have now used the “4D-Var” term throughout the manuscript.

**Rev#2:** 5. The synthetic experiments with the CESM is a great piece of work, but unfortunately quite inconclusive. This is unexpected since we could have hoped for clear and neat results with such experiments. Tables 4 and 5 point to unclarified problems in the experiments. It is nice to use an ETKF in conjunction with a Gaussian anamorphosis. However, if the outcome is inconclusive (is it?), then it casts doubts on the interest of such test, or more likely on the implementation of the method (bugs?). See additional comments below (sorry for the redundancy).

**Auth:** The main conclusion of the CESM experiment is that the iterative/recursive schemes based on simple numerically-estimated local sensitivities (even with non-optimal perturbations) are more able to deal with the non-linear relation between the inputs and the observation space than a single linear step (in the experiment), even if this is based on a denser sampling of the prior input PDF (as the EnKF). We acknowledge that more detailed experimentation is needed.

We have not found any bug in the Gaussian Anamorphosis (GA) as implemented. However, given the comment we felt that some clarification was needed. We have so provided further explanation on the specific GA analysis, including the justification of the tests, and an additional analysis where only the “inputs” (control variables) were transformed but the dual of the observation space (sea surface temperature, SST) was not (the formed GA transformed both in univariate way). Also, we have included additional plots regarding the transformations. Hopefully, these are informative about the non-linear relation between inputs and SST and how the two used forms of GA were able or not to provide a “pseudo-linearization”. The plots also support a reason of why the GA (as applied in either case) was not completely successful despite general increase in univariate Gaussianity. Irrespective of the success of the GA

experiment, we consider it is worth reporting the results as support to guide/encourage further possible experimentation.

**Rev#2:** 6. It would be worth introducing in the CESM synthetic experiment some additional model error that you do not control in order to check how the methods are compensating for this error. This would be realistic and convincing.

**Auth:** We agree. For real applications, the selection of the (computationally feasible) control variables should be done based in sensitivity analysis. The control variables are responsible in the assimilation for all model errors, including compensation of model biases (in the tuned model) elsewhere. We have added a paragraph in the introduction to clarify this and that the purpose of included uncertain (deterministic) parameters in the control variables here is not to tune the model. The model is assumed to be previously tuned. A subset of the more “sensitive” but possibly uncertain parameters should be chosen as control vector to generate the background state needed for the assimilation. The purpose if the schemes is to produce mean climate field reconstructions for past climates at long scales. Differences between updated parameters and “tuned” values can be evaluated to diagnose the possible reasons for these. This is now clarified in the introduction.

Regarding the experiments, as a step-by-step approach we chose a scenario in which all sources of uncertainty were included in the control vector (a subset of model parameters, plus a freshwater flux term from Greenland and forcing from greenhouse gases). We understand this is the first time a fully coupled CESM is evaluated (even for a identical twin experiment) for the assimilation of data from a past climate multiproxy database (the MARGO Last Glacial Maximum in this case), and the experiments conducted have taken a considerable computing effort (possible thanks to HLRN III, the North Germany HPC). We have included some furthr test so that the IKS is now also evaluated with the CESM twin experiment. But it is not feasible for us to expand the analyses within the scope of this manuscript. We are looking forward (from ourselves or other colleagues in the community) for additional experiments, including the evaluation of specific error compensations (which will never be general).

**Rev#2:** 7. Why is the data assimilation code not available? I thought it would be mandatory to do so for GMD, is it?

**Auth:** We are making the DA and Ebm1D codes available. CESM v1.2 is already available.

**Rev#2:** List of remarks and suggestions, some pertaining to the main criticisms:

1. page 1, l.4-5: "In a model framework where we assume that model dynamic parameters account for (nearly) all forecast errors at observation times,": Right, but is this framework usually met?

**Auth:** In a past-climate context (paleo-climate) deterministic Earth System models (ESMs) converge to their own climatology and the memory of (reasonable) initial conditions is lost after some integration time. This assumption is related to the time footprint of paleoclimate proxy observations. We believe this comment is implicitly answered in the answers to comments 26 & 27 below.

**Rev#2:** 2. page 1, 12: "are evaluated in numerical experiments": Are these twin/synthetic experiments? In other words do you use real observations or synthetic ones? It is necessary to mention it here in the abstract.

**Auth:** Clarified that the first experiment uses “present-day surface air temperature from the NCEP/NCAR reanalysis data as target” and the second one (our object of study) is a synthetic experiment with the Community Earth System Model (CESM v1.2).

**Rev#2:** 3. Page 1, l.14: "the pFKS obtains a cost function": This expression seems meaningless. Please rephrase.

**Auth:** Removed.

**Rev#2:** 4. Page 1, l.14: the expression "adjoint method" should be avoided as it is not well defined.

**Auth:** Replaced by "4D-Var".

**Rev#2:** 5. Page 1, l.14-15: Frankly, the whole sentence "Firstly, with Ebm1D the pFKS...behaves slightly worse." is difficult to understand, especially in an abstract. (For me, the technical terms are not the problem, since I am fluent in them.)

**Auth:** Rewritten.

**Rev#2:** 6. Page 1, l.17: You have to explain in the abstract why you would use an ETKF with a Gaussian anamorphosis or not mention it at all.

**Auth:** Explained.

**Rev#2:** 7. Page 1, l.18: Having the lowest cost function value is rarely a criterion as it depends much on the prior used in the cost function.

**Auth:** Cost functions at each experiment use the same prior for each scheme. We indicate now that we focus here on the analysis step.

**Rev#2:** 8. Page 1, l.21: "The issue of fusing data into models arises in all scientific areas that enjoy a profusion of data.": Not really. This is specific to areas where costly models are used!

**Auth:** Modified to "...in scientific areas that enjoy a profusion of data and costly models are used."

**Rev#2:** 9. Page 1, l.23-24: "Such methods can be considered as an approach for interpolating or smoothing a data set in space and time where a model acts as a dynamical constraint (Evensen, 1994a)": I don't believe you should use such outdated comment, all the more since nowadays there is a general consensus on a Bayesian view on data assimilation/inverse problems.

**Auth:** We do not see why this comment by Evensen (1994a), which is a point of view, clashes with the Bayesian perspective. It is often echoed with similar wording in recent DA literature, while acknowledging the Bayesian view. In any case, in a now shortened introduction we have rewritten the paragraph and indicated now the Bayesian view of DA methods.

**Rev#2:** 10. Page 2, l.16-19: "Other geophysical applications share this relevance of model parameters on the assimilation problem, as the estimation of distributed parameters and state for multiphase flow in petroleum reservoirs (e.g.; Gu and Oliver, 2007; Oliver et al., 2011), or hydraulic tomography for groundwater applications (e.g.; Schöniger et al., 2012).": You should mention atmospheric chemistry first, all the more since it quite close to climate (e.g., Bocquet et al., 2015).

**Auth:** We have now given a short introduction to the context of Earth system modelling of climate, which is more relevant. Then, to shorten the manuscript, we have decided to remove the complete reference, which is more distant to the manuscript.

**Rev#2:** 11. Page 2, l.20: "A related issue is the enforcement of physically based conservation laws, which by default is not taken into account by (ensemble) Kalman filters." No! You are right in general, but all linear constraints are properly enforced. (Which is why the use of the EnKF is widely spread!)

**Auth:** Yes, but this is exactly the justification for the cited work of Janjic et al (2014) and other work, who deal with the incorporation of constraints in the EnKF to preserve mass, angular momentum and energy. Still, we have removed the comment to shorten the manuscript.

**Rev#2:** 12. Page 2, l.23: ";"

**Auth:** Done.

**Rev#2:** 13. Page 2, l.23: "confirming re-integration": This is unclear to me. Please clarify.

**Auth:** Clarified.

**Rev#2:** 14. Page 2, l.30: "under the assumption the errors" –! "under the assumption that the errors"

**Auth:** Modified.

**Rev#2:** 15. Page 3, l.3: "conduct" –! "conducted"

**Auth:** Done.

**Rev#2:** 16. Page 3, l.6: "in section ,": Section number is missing.

**Auth:** Corrected.

**Rev#2:** 17. Page 3, l.9: "adjoint method": please avoid this expression. It does not correspond to anything rigorous.

**Auth:** Changed to "4D-Var".

**Rev#2:** 18. Page 3, l.17: "opposed" –! "as opposed"

**Auth:** Corrected.

**Rev#2:** 19. Page 3, l.17-18: This is an outdated view. Today, it is considered a doable task to estimate uncertainty within a variational framework (this is actually operational at the ECMWF). Read for instance Bousserez et al. (2015).

**Auth:** The point here was to indicate B is 4D-Var is not evolving (although it could). The hybrid methods ---En4DVar---in operational centers (e.g. ECMWF, UKMO, GMAO, Meteo-France), use an ensemble, in several ways (as ensemble of 4Dvars, etc.), for the flow-dependent term of B. We have removed the comment in any case.

**Rev#2:** 20. Page 3, l.24-25: "Other than that the formulation is identical than it would be for the corresponding filtering versions.": unclear or awkward.

**Auth:** Removed in new version.

**Rev#2:** 21. Page 3, l.31: Twin experiments? This should be mentioned here as well.

**Auth:** Done

**Rev#2:** 22. Page 4, l.2: "the not only" –! "not only"

**Auth:** Done.

**Rev#2:** 23. Page 4, l.18-19: "We also assume that the model is weakly nonlinear, such that it can be linearized.": This is not a clear statement. Any smooth model (even very nonlinear ones!) can be linearised.

**Auth:** This referred to the sense used in pp.65 in Tarantola (2005), where discussing various degrees on nonlinearity he refers to “forward equations that cannot be linearized, so the a posteriori probability density may be far from a Gaussian and special methods must be used...”. In any case, we have removed this comment and the complete Section to shorten the manuscript as requested.

**Rev#2:** 24. Page 4, l.20: "small": do you mean low-dimensional?

**Auth:** Yes. Modified.

**Rev#2:** 25. Page 4, l.28: "The problem is to fit three spatial dimensions in time.": the sentence is unclear. "in" –! "and"?

**Auth:** Modified to: “The problem is to estimate the state of a past climate state along a time window for multidecadal and longer time scales.”

**Rev#2:** 26. Page 5, l.1: Assuming time-invariant system is very restrictive in climate models where most forcings are time-dependent. Please justify.

**Auth:**

We consider two applications of the simplified described schemes: a) reconstruction of climate with equilibrium simulations (e.g.; mean (annual, and seasonal) climate reconstruction for the Last Glacial maximum) or mid-Holocene. Here, solar forcing (variability and orbital parameters) is inter-annually stationary. Greenhouse gas forcings (GHGs) may be control variables or not, depending on whether they are part of the prognostic variables. Ozone-aerosols land use and volcanic eruptions would normally be set as certain, and not estimated. That is, for equilibrium simulations the model is left to converge, and the control vector would most commonly a set of the (deterministic) parameters for model physics. This is the more straightforward application.

For transient simulation, with time-evolving forcing, we would not generally include most of the common forcings in the control variables.

In any case, for GHGs, we would generally use the most recent reconstruction by Peter Köhler et al. (2017) more than prognostic GHGs, which reaches until 156 kyr. We could include an error term for these GHGs that would be constant within each DAW (of the order of some hundred years), and estimated as part of the assimilation for subsequent DAWs. Flux correction term can be treated similarly (which we can consider as a parametric way of dealing with model error).

**Rev#2:** 27. Page 5, l.6: "That is, that the system..." –! "That is, the system..."

**Auth:** Done.

**Rev#2:** 28. Page 5, line 23: "in 4D-Var then" –! "in 4D-Var is then"?

**Auth:** Done.

**Rev#2:** 29. Page 5, line 23: "non-linear" –! "non-quadratic"

**Auth:** Yes! Sorry. Done.

**Rev#2:** 30. Page 7, line 6: "is the same that" –! "is the same as"?

**Auth:** Done.

**Rev#2:** 31. Page 7, line 7: "4D-Var, IKS" –! "4D-Var, the IKS"

**Auth:** This sentence has been removed (redundant).

**Rev#2:** 32. Page 7, Eq.(16) and around: Such an operator exists only if the observations are time-averaged values, right? In general observations will depend on the initial condition. This must be discussed (this is actually better discussed in the introduction!).

**Auth:** We would say the operator (as the simplified schemes) is applicable under the condition that the observations have long-time averages. Most of the paleoclimate proxy observations have temporal resolution longer than decadal (some much longer). For example, the simplified approach followed in the describe schemes would not be suited to assimilate coral records (Sr/Ca or  $\delta^{18}O$ ) with its full annual resolution (when available) for the last two hundred years (an IEnKS could be used instead). This would result in the initial conditions being too influential in the background state at the observation times (an IEnKS could be used instead to include these in a low-rank formulation). This is now discussed in the introduction.

**Rev#2:** 33. Page 7, line 8: What is a "quasi-equilibrium"?

**Auth:** Clarified as: "(we denote this here as *quasi-equilibrium*). That is, it is possible that the deep ocean circulation still has not converged to its dynamical attractor, but this has a negligible effect on the model climate at the surface."

**Rev#2:** 34. Page 7, line 14: In my opinion, there is no need to introduce a new term. This is just an IKS in parameter space.

**Auth:** We have replaced the pKS terminology by NLS-IKS. See answer to general comment 3.

**Rev#2:** 35. Page 8, Eq.(17): This type of formulation is frequent in many areas of geosciences; there is no need to look as far as history matching in oil reservoir modelling. For instance, this is very often met in source/fluxes inverse problems in atmospheric chemistry.

**Auth:** We have removed these comments.

**Rev#2:** 36. Page 8, line 13: "While it": A typo?

**Auth:** Yes; 'it' removed.

**Rev#2:** 37. Page 9: In my opinion the discussion on the computation of the sensitivities is not only convoluted but also not very useful. It is obvious to the reader (to me at least), that you will use finite-differences in the end. Essentially only the last paragraph of section 3.2 is needed.

**Auth:** A known drawback in finite differences approximations to sensitivity is the rounding issue, related to the selection of optimal perturbations. If computationally feasible, a regression around a small univariate ensemble helps instead of a single perturbation. As described, we did so in the first experiment (Section 4.3). Still, we have simplified this discussion.

**Rev#2:** 38. Page 9, Eq.(22): The linearisation in parameter space should be carried out at the  $j$ -th estimate of the parameters, not the background parameters (except for  $j=1$ ). What you wrote is just an approximation, which would make the iterative approach not as accurate as expected. Please clarify.

**Auth:** Yes, as indicated later in Eqs. (25) and (30), but agree this is confusing. We have removed the "b" superindex to make this general (as the iterative methods come after this), and clarified the point.

**Rev#2:** 39. Page 10, line 20: "Iterative linear methods" is awkward, even though I guess I understand what you mean.

**Auth:** Rephrased.

**Rev#2:** 40. Page 10, line 24: Parentheses are needed around Bell and Cathey (1993).

**Auth:** Done.

**Rev#2:** 41. Page 10, beginning of section 3.3: I don't see the point in the discussion with the EnRML. You can probably do without it.

**Auth:** Removed

**Rev#2:** 42. Page 11, Eq.(25): The notation is unclear (I understand but many colleagues would not) and should be made consistent with Eq.(22).

**Auth:** Clarified and Eq.(22) modified to be consistent with this. The loop index is dropped (and explained) in the general sensitivity description, and explicitly indicated in the algorithms.

**Rev#2:** 43. Page 11, line 22: Actually the use of the MDA trick is slightly different in Bocquet and Sakov (2014) than in Emerick and Reynolds (2013), because the weights are adjusted over several data assimilation cycles.

**Auth:** Yes, we know both papers. This has been specified.

**Rev#2:** 44. Another reference relevant to your manuscript is a study of the iterative ensemble Kalman smoother applied to a joint state and parameters estimation problem (Bocquet and Sakov, 2013).

**Auth:** Included.

**Rev#2:** 45. Page 12, line 21: "opposite to" –! "as opposed to"

**Auth:** Done.

**Rev#2:** 46. Page 13, line 21: The sentence is a bit ambiguous since the model integration is part of the analysis (and so-to-speak a part of the analysis!). Please reformulate.

**Auth:** Rewritten ("analysis" was used to mean "assimilation"; we understand the ambiguity).

**Rev#2:** 47. Page 13, line 26: What is a "temporal solution"?

**Auth:** We have redone this small section. Actually, more than "truncated" solutions these are "early stopped" iterations, which provide an alternatives (also approximate) solutions.

**Rev#2:** 48. Page 13, line 27: "detect linearity assumption": This expression is unclear. Please rephrase.

**Auth:** Rephrased .

**Rev#2:** 49. Page 13, line 3: I am familiar with the Levenberg-Marquardt scheme(s) and I do not understand your sentence!

**Auth:** We removed the sentence. It is actually wrong (it would be an alternative, not a combination of these two) and not needed. Now, we cite earlier (Section 2.1) schemes combining Gauss-Newton with the multiple assimilation approach (the lenKS of Bocquet and Sakov, 2013, 2014).

**Rev#2:** 50. Page 13, line 12-14: You have to give more details of your implementation. First, I do not see why you would need localisation for the state variables, since you are not updating them. Second, it is well known that, without a few tweaks, one cannot update global parameters in a LETKF.



**Auth:** True. We do not use localization. This was a remainder of former versions in which we did use LETKF for independent state estimate, but this does not apply here. Any reference to localization has been removed, and we have clarified that we use a mean-preserving (or the “spherical simplex”) ETKF. See new text and references.

**Rev#2:** 51. Page 14, line 21: "It is not standard, however, how the GA should be applied in the context of DA.": There have been reviews and papers about that; for instance Bertino et al. (2003), as you rightfully mentioned, but also Bocquet et al. (2010); and above all Simon and Bertino (2009) and Béal et al. (2010) who set the standard on this topic. As far as I can understand, you are using their method. Please amend.

**Auth:** Clarified. The section has been expanded according the comments.

**Rev#2:** 52. Page 15, l.9: "adjoint method (4D-Var)" –! "4D-Var (based on the adjoint)".

**Auth:** Done.

**Rev#2:** 53. Page 15, l.11, L.13, l.27: Please avoid the "adjoint method" expression which is really outdated, and not use in data assimilation study. Refer instead to 4D-Var or variational method, possibly mentioning the use of the adjoint model.

**Auth:** Done.

**Rev#2:** 54. Page 15, l.24, "standard 4D-Var applications" –! "standard in 4D-Var applications"?

**Auth:** Done.

**Rev#2:**55. Page 15, l.29-30: I do not understand the last sentence.

**Auth:** Now splitted in two and merged with a previous paragraph: "...,which we considered as reasonable uncertainty values. Other than the parametric uncertainty we considered a perfect-model framework."

**Rev#2:**56. Page 15-16, section 4.1: Where did you describe the parameters and how many are they? This is absolutely key to the feasibility of the problem. There are tables; but the parameter should be more clearly discussed in the text.

**Auth:** We considered sufficient to refer to Paul and Losch (2012) [PL2012], as stated in former l.14, for the model (and parameter) description. We still believe it is not worth to reproduce the description in PL2012, which would make this manuscript longer, considering that in this manuscript this a first test and the experiment with CESM is the main focus. We have now, however, clarified that there are only five (scalar) parameters in this experiment, and included a short description of these parameters, referring to PL2012 as considered adequate and for broader explanation.

**Rev#2:** 57. Page 17, line 4: "Note the original" –! "Note that the original".

**Auth:** Done.

**Rev#2:** 58. Page 17-18, section 4.3: In this section, you keep referring to the "adjoint method". Please do not use this term. This is a loose term, used in a loose way which generates confusion. At best, it refers to the computation of the gradient via the adjoint model, and not to the optimisation method you actually imply. That is why it is not used in written texts of the data assimilation community. You even refers on page 18 to the "adjoint", a short-cut which definitely lacks rigour.

**Auth:** Replaced by “4D-Var”. See answer to general comment 4 above.

**Rev#2:** 59. Page 18, lines 1-14: It seems that it all boils down to the presence or absence of a prior for the parameters. Isn't it? If this is so, then this discussion is not really focused on what it should be.

**Auth:** We agree that the comparison with Paul and Losch (2012) [PL2012], in which the regularization term for the parameters was not considered, was far from ideal. We have now conducted a new 4D-Var test using exactly the same cost function as for the other methods in the experiment, so that the benchmarking is now fair. The description of the experiment and results have been updated accordingly. We have also now dropped the ETKF<sub>10</sub> test (ETKF with  $m=10$  members). Considering that the number of integrations in this case is substantially smaller than the rest of the schemes, it is no wonder it does not behave very well. We have left the ETKF<sub>60</sub>, which is computationally more comparable with the iterated schemes in this experiment. Finally, in our previous test, weights given to individual observations in term  $J_y$  in the cost function in PL2012 ranged from  $\sim 1$  for observations close to the Equator to  $\sim 0$  for observations toward the Poles. We have realised that PL2012, forced then these weights to sum to one, with the net effect that  $J_y$  was about five times higher in our case for similar innovations. In the updated version weights sum to one as in PL2012, which leads to higher effect of the regularization term. Ultimately, this makes the (now called) NLS-IKS more stable, which now obtains a lower total cost function value than the (now called) NLS-MKS. This could be expected but now is explicitly quantified. A major result is that the NLS-IKS results in posterior parameters and cost value that are nearly identical than 4D-Var.

**Rev#2:** 60. Page 20, line 9: "multi-component data assimilation": To the best of my knowledge/ understanding, this is rather called "strongly coupled data assimilation".

**Auth:** Replaced by "strongly coupled". The "multi-component data assimilation" term is often used in the ESMs data assimilation context (e.g.; NCAR teams), in this sense. We agree "strongly coupled" is more clearly defined.

**Rev#2:** 61. Page 20-21: I would more precisely enumerate/list/discuss the control variables.

For instance, at some point, clearly mention: "Hence, our first control variable is..." etc.

**Auth:** Done.

### **References (not included in the paper)**

All references here are included in the manuscript
